# Supplementary material for: Optimization of process models for determining volatility distribution and viscosity of organic aerosols from isothermal particle evaporation data
Source: Copernicus journal article supplement (doi:10.5194/acp-2019-158), 2019-03-05
Supplement: Supplementary file 1 [file acp-2019-158-supplement.pdf]

## Supplementary material

**Table S1:** The saturation concentrations and mole fractions of each evaporating compound at the start of the evaporation in the artificial data set 4

| Compound # | $C_{\text{sat}}$ ( $\mu\text{g}/\text{m}^3$ ) | $x_{\text{mole}}(t=0\text{s})$ | Compound # | $C_{\text{sat}}$ ( $\mu\text{g}/\text{m}^3$ ) | $x_{\text{mole}}(t=0\text{s})$ |
|------------|-----------------------------------------------|--------------------------------|------------|-----------------------------------------------|--------------------------------|
| 1          | $3.27 \cdot 10^{-5}$                          | 0.053                          | 21         | $6.47 \cdot 10^{-1}$                          | 0.025                          |
| 2          | $3.55 \cdot 10^{-5}$                          | 0.053                          | 22         | 1.67                                          | 0.022                          |
| 3          | $8.86 \cdot 10^{-5}$                          | 0.050                          | 23         | 1.80                                          | 0.022                          |
| 4          | $1.07 \cdot 10^{-4}$                          | 0.050                          | 24         | 5.73                                          | 0.018                          |
| 5          | $3.02 \cdot 10^{-4}$                          | 0.047                          | 25         | 6.25                                          | 0.018                          |
| 6          | $3.67 \cdot 10^{-4}$                          | 0.046                          | 26         | 7.28                                          | 0.018                          |
| 7          | $4.38 \cdot 10^{-4}$                          | 0.046                          | 27         | 13.72                                         | 0.016                          |
| 8          | $5.45 \cdot 10^{-4}$                          | 0.045                          | 28         | 37.07                                         | 0.013                          |
| 9          | $6.09 \cdot 10^{-4}$                          | 0.045                          | 29         | 59.29                                         | 0.011                          |
| 10         | $6.04 \cdot 10^{-3}$                          | 0.038                          | 30         | 89.93                                         | 0.010                          |
| 11         | $8.73 \cdot 10^{-3}$                          | 0.037                          | 31         | 99.71                                         | 0.010                          |
| 12         | $8.85 \cdot 10^{-3}$                          | 0.037                          | 32         | 114.89                                        | 0.010                          |
| 13         | $2.67 \cdot 10^{-2}$                          | 0.034                          | 33         | 225.40                                        | 0.008                          |
| 14         | $3.24 \cdot 10^{-2}$                          | 0.033                          | 34         | 239.17                                        | 0.008                          |
| 15         | $1.16 \cdot 10^{-1}$                          | 0.029                          | 35         | 254.60                                        | 0.007                          |
| 16         | $2.78 \cdot 10^{-1}$                          | 0.027                          | 36         | 260.78                                        | 0.007                          |
| 17         | $3.05 \cdot 10^{-1}$                          | 0.027                          | 37         | 698.02                                        | 0.004                          |
| 18         | $4.04 \cdot 10^{-1}$                          | 0.026                          | 38         | 1380.27                                       | 0.002                          |
| 19         | $5.62 \cdot 10^{-1}$                          | 0.025                          | 39         | 2104.00                                       | 0.001                          |
| 20         | $5.96 \cdot 10^{-1}$                          | 0.025                          | 40         | 3059.89                                       | 0.001                          |

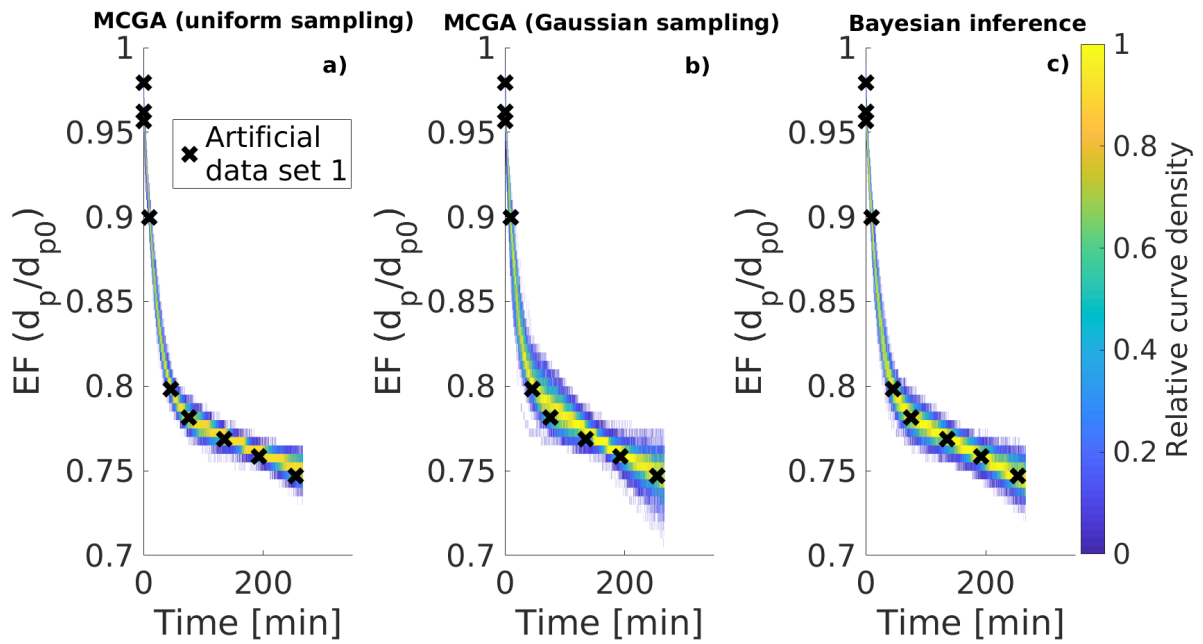

**Figure S1:** Relative evaporation curve density of the three different optimization schemes applied to artificial data set 1. The relative evaporation curve density is calculated by dividing the EF and time space to grids and counting how many of the simulated evaporation curve goes through a particular grid box. The counts are then normalized by the highest count in every time column. White color indicates that no simulation goes through that area. a) MCGA method with uniform sampling of the parameter space. b) MCGA with sampling similar to the Bayesian inversion method (see main text, Sect. 3) c) Bayesian inference method.

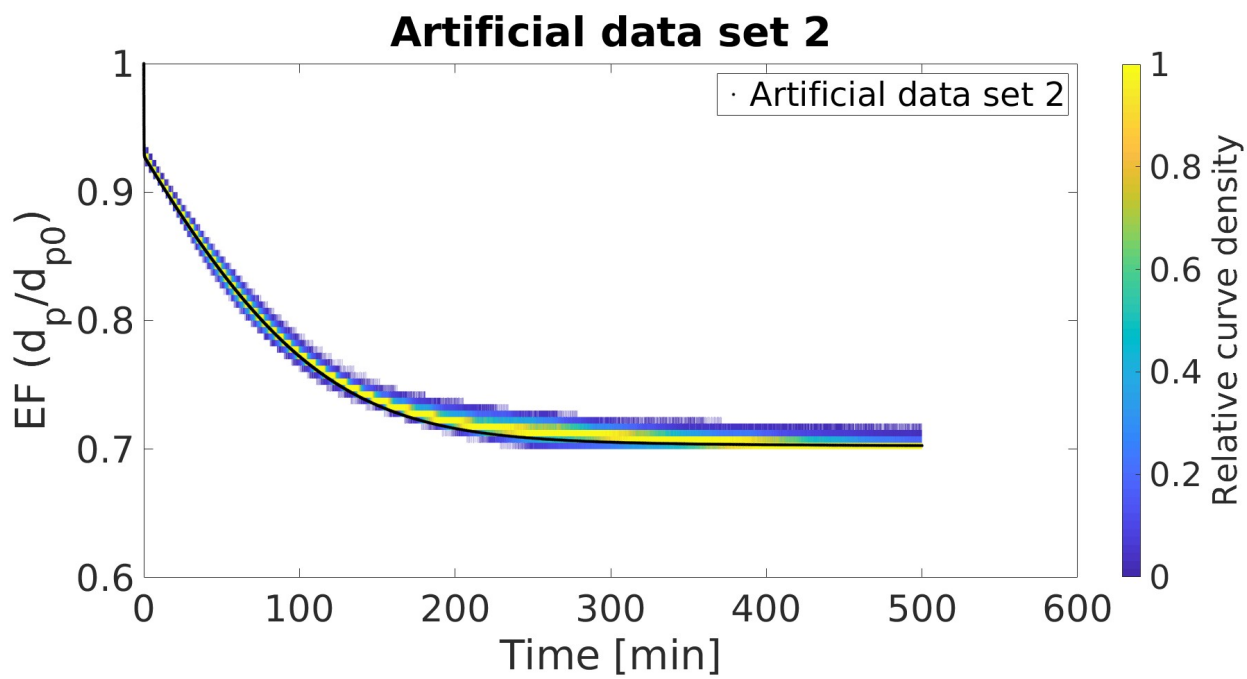

**Figure S2:** Relative evaporation curve density of the 500 MCGA optimization rounds for the artificial data set 2.

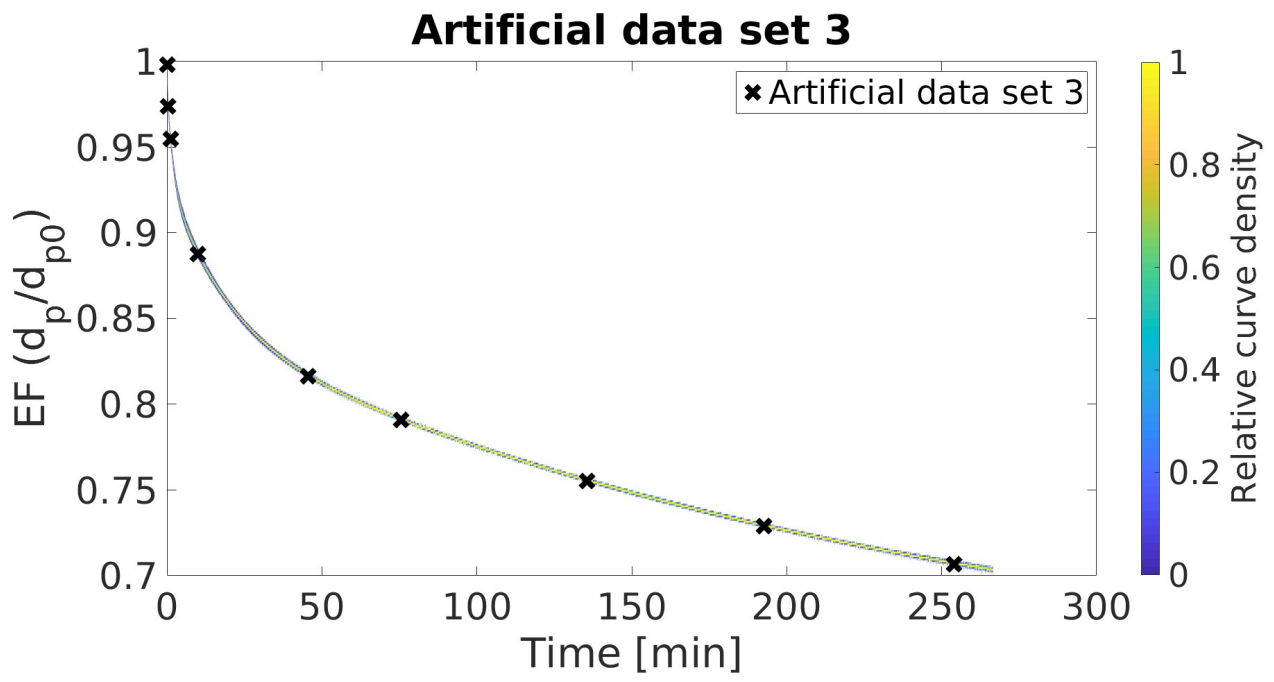

**Figure S3:** Relative evaporation curve density of the 500 MCGA optimization rounds for the artificial data set 3.

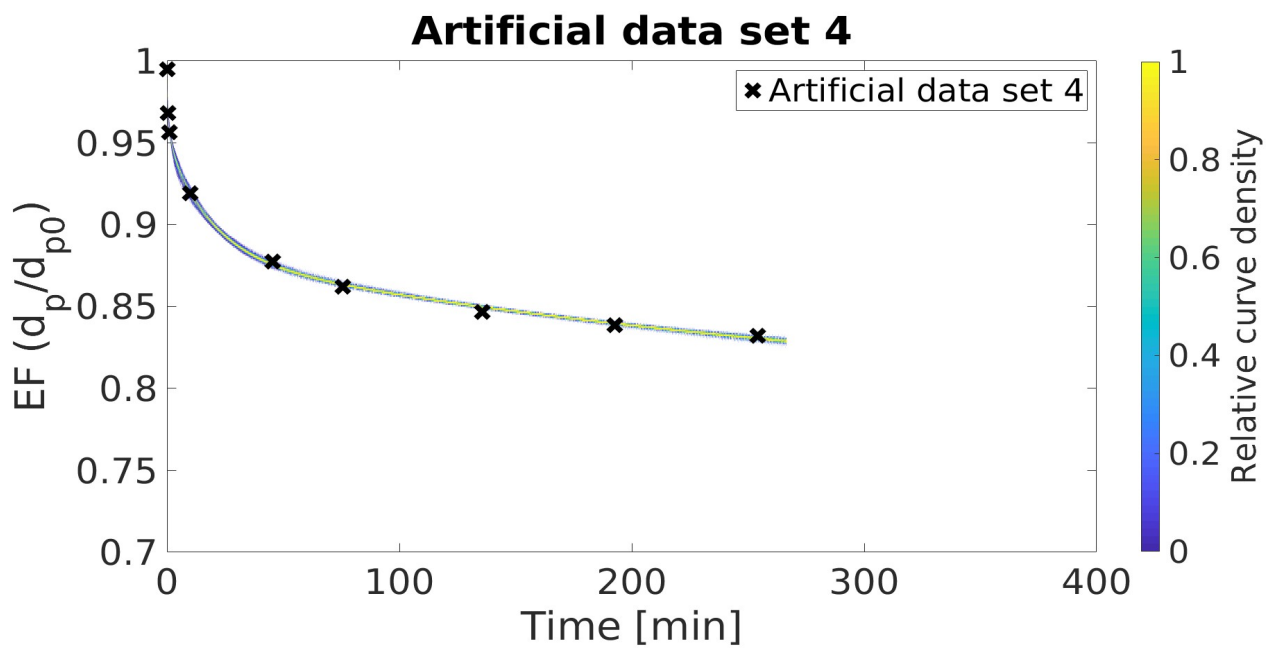

**Figure S4:** Relative evaporation curve density of the 500 MCGA optimization rounds for the artificial data set 4.

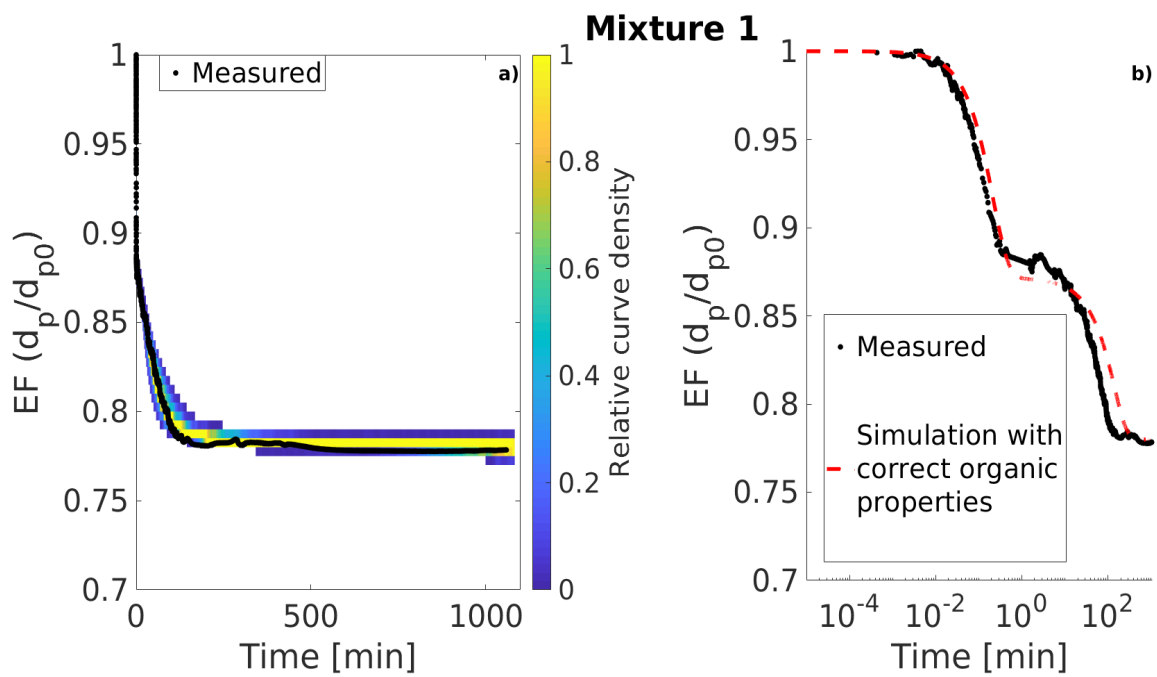

**Figure S5:** a) Relative evaporation curve density of the 100 MCGA optimization rounds from the optimization of the LLEVAP model to match measured particle evaporation of particles generated from mixture 1. b) Measured evaporation (black dots) and modelled evaporation (red dashed line) calculated by using correct properties of mixture 1 as an input.

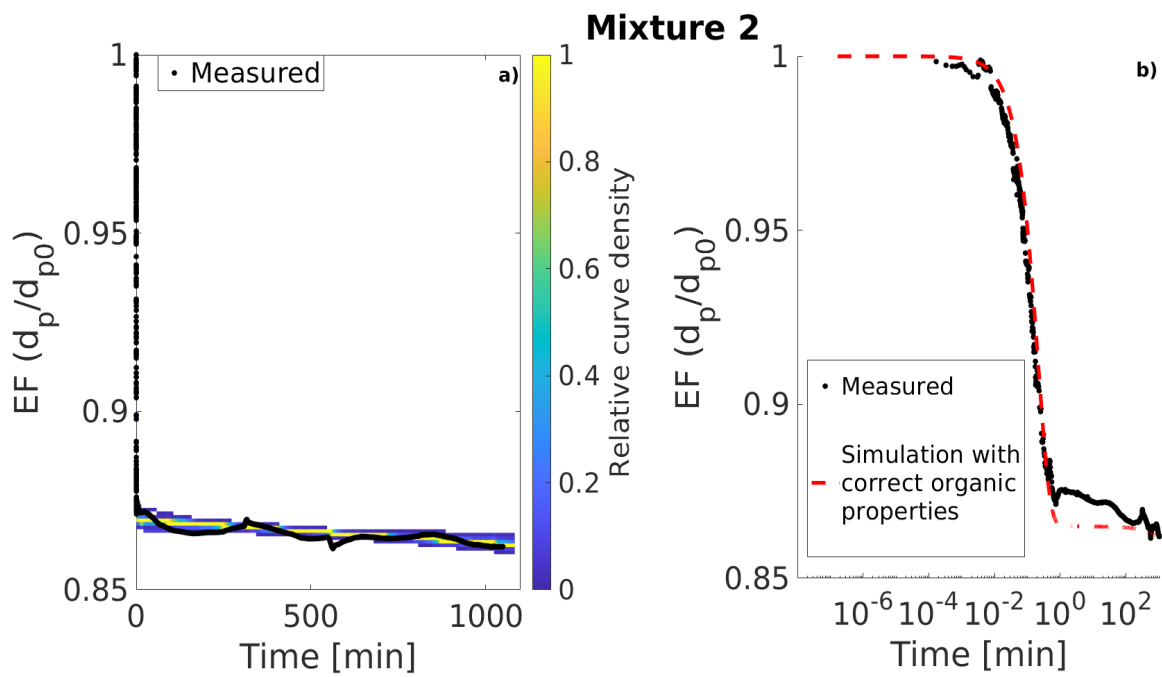

**Figure S6:** a) Relative evaporation curve density of the 100 MCGA optimization rounds from the optimization of the LLEVAP model to match measured particle evaporation of particles generated from mixture 2. b) Measured evaporation (black dots) and modelled evaporation (red dashed line) calculated by using correct properties of mixture 2 as an input.

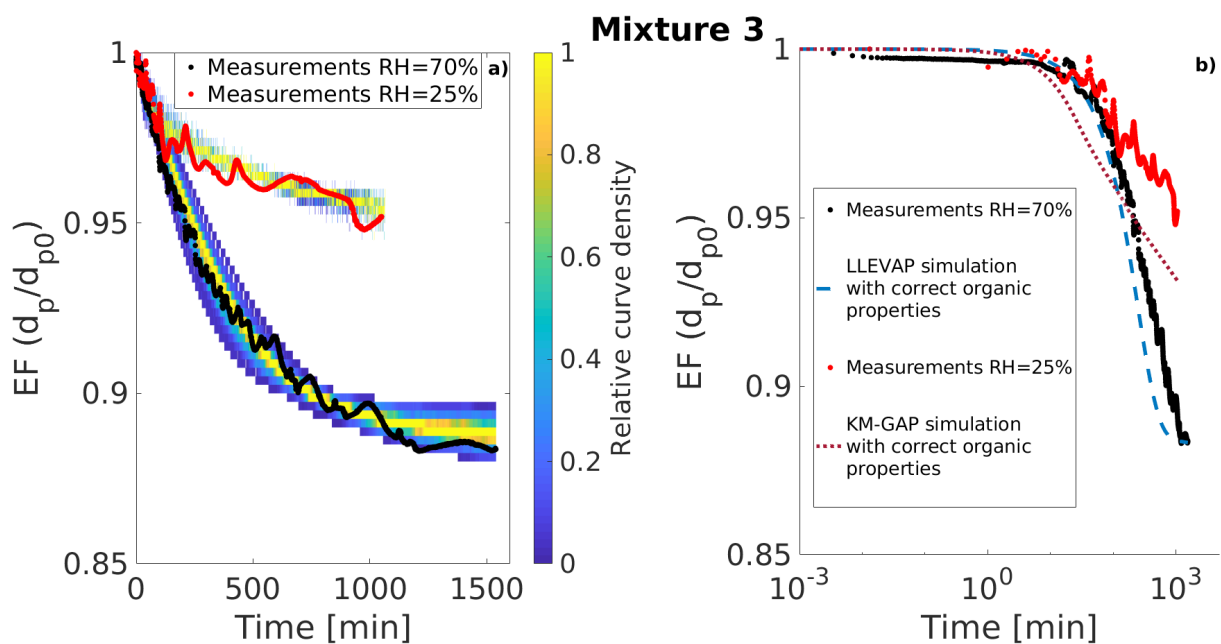

**Figure S7:** a) Relative evaporation curve density of the 100 MCGA optimization rounds from the optimization of the LLEVAP model to match measured particle evaporation at high RH (black dots) and KM-GAP model to match measured evaporation at lower RH (red dots). The particles, whose evaporation was measured, were generated from mixture 3. b) Measured evaporation (black dots for high RH and red dots for low RH) and modelled evaporation (red and brown dashed line) calculated by using correct properties of mixture 3 as an input.



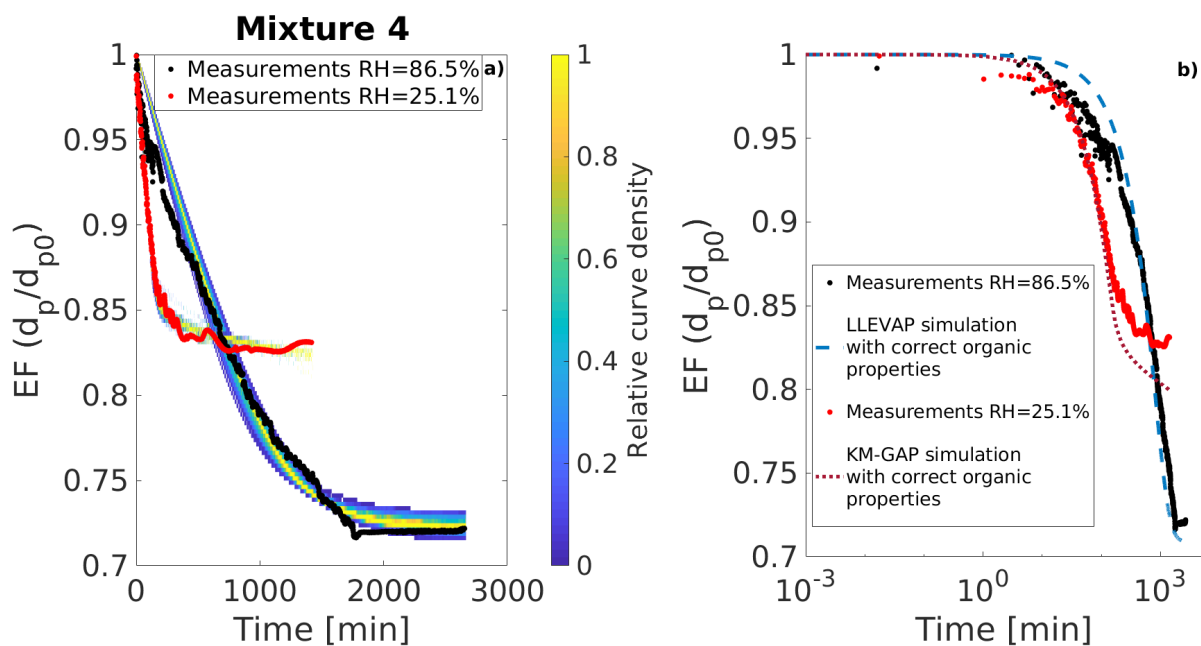

**Figure S8:** a) Relative evaporation curve density of the 100 MCGA optimization rounds from the optimization of the LLEVAP model to match measured particle evaporation at high RH (black dots) and KM-GAP model to match measured evaporation at lower RH (red dots). The particles, whose evaporation was measured, were generated from mixture 4. b) Measured evaporation (black dots for high RH and red dots for low RH) and modelled evaporation (red and brown dashed line) calculated by using correct properties of mixture 4 as an input.

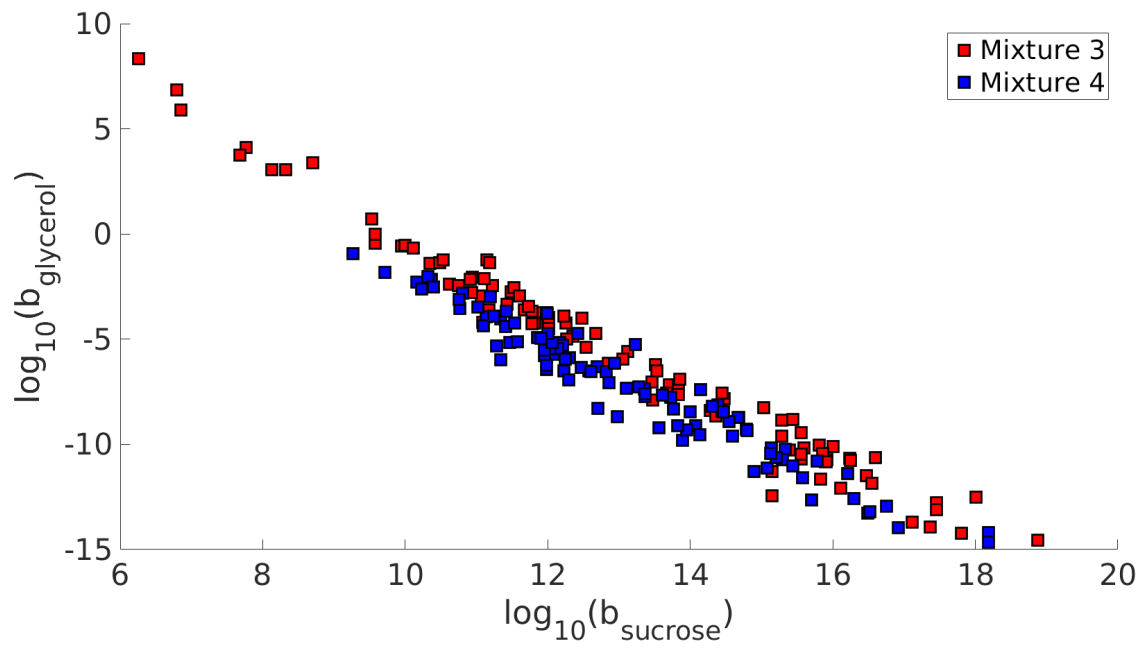

**Figure S9:** The correlation of estimated  $b$ -parameters for sucrose and glycerol in mixtures 3 and 4.
